# Supplementary material
Source: publisher figshare collection journal article supplement (https://frontiersin.figshare.com/ndownloader/files/28996458)
Supplement: Supplementary file [file 28996458]

## Supporting Information Legends

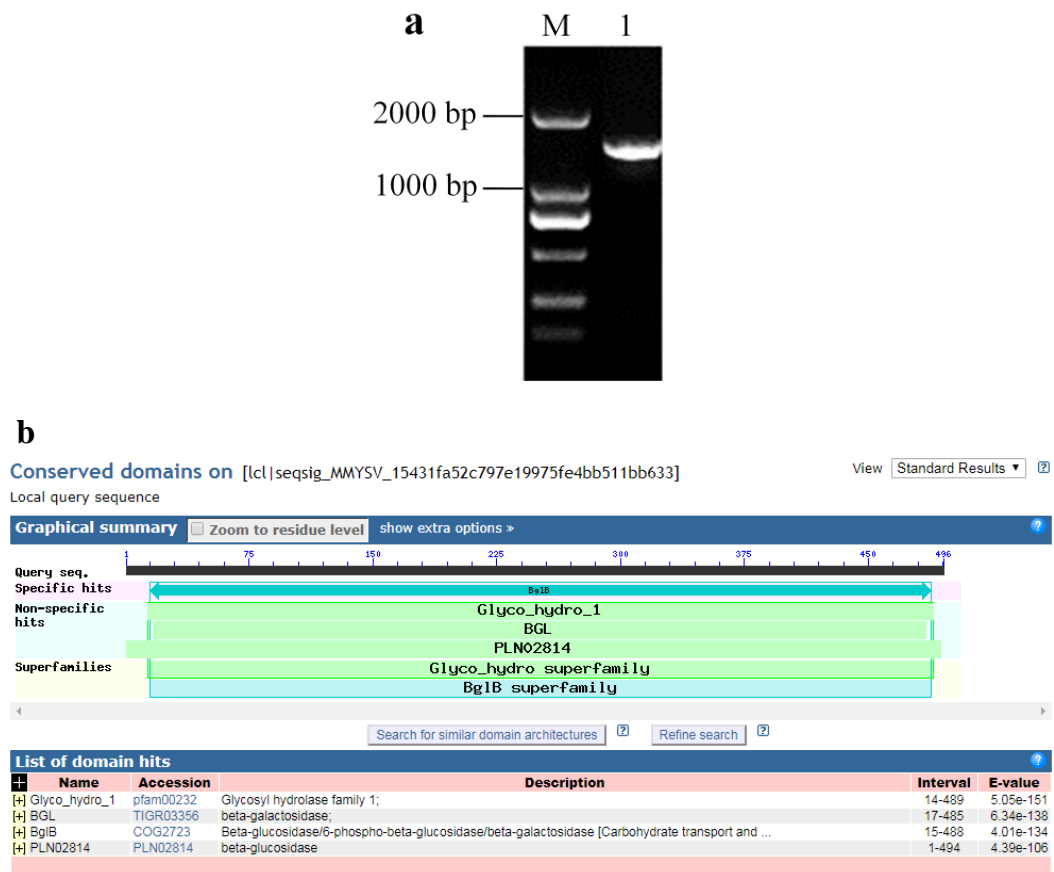

**FIGURE S1** | RT-PCR amplification of the open reading frame (ORF) of *VmGlu2* (a) and conserved domains of *VmGlu2* (b). The domain of *VmGlu2* was predicted using NCBI’s conserved domain database.

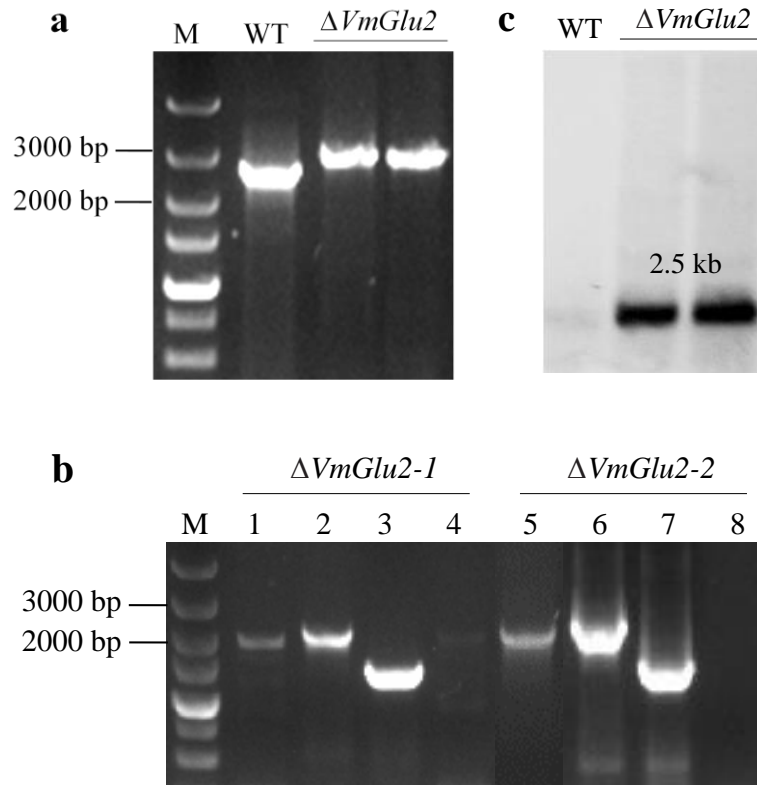

**FIGURE S2** | Gene deletion verification of *VmGlu2* by PCR and Southern blot analysis.

(a) Detection of *VmGlu2* deletion mutants by PCR with detection primer pairs with primer pair *VmGlu2*-I-F/R (detection of fusion segment). (b) Detection of *VmGlu2* deletion mutants by PCR with four primer pairs. Lane 1 and 5, *VmGlu2*-Up-F/HPH-R (detection of upstream of *VmGlu2* and *HPH* gene); Lane 2 and 6, HPH-F/*VmGlu2*-Down-R (detection of HPH gene and downstream of *VmGlu2*); Lane 3 and 7, HPH-F/HPH-R (detection of HPH resistance gene); Lane 4 and 8, *VmGlu2*-F/*VmGlu2*-R (detection of *VmGlu2* gene). (c) Further confirmation of *VmGlu2* gene deletion mutants by Southern blot.

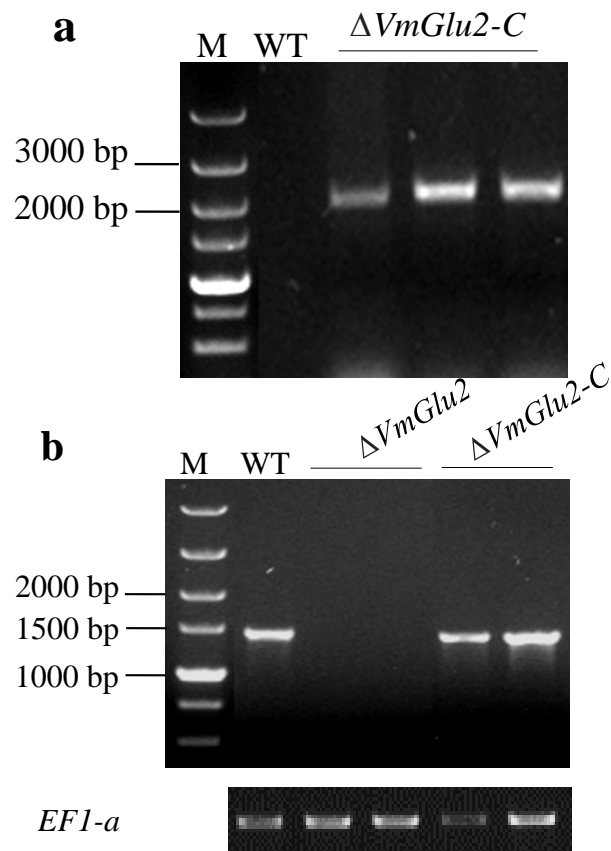

**FIGURE S3** | Detection of complementation strains by PCR and RT-PCR. (a) The primer pair *VmGlu2-ID-F/R* was used to detect the complementary fragments by PCR from the genomic DNA of *VmGlu2* gene complementation strains. (b) Detection of *VmGlu2* from the wild-type strain, *VmGlu2* deletion mutants and complementation strains by RT-PCR. The housekeeping gene *EF1-a* was used as control.

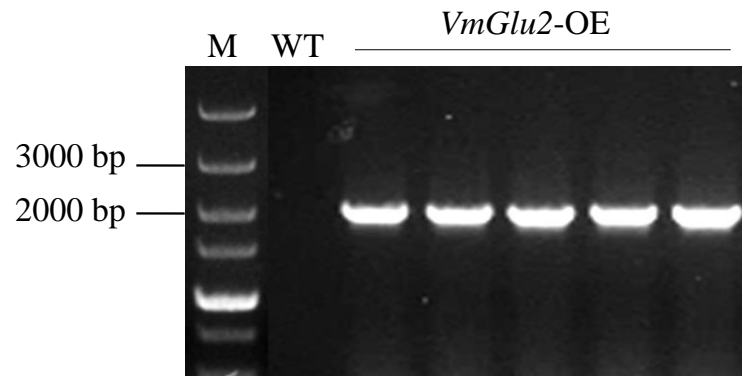

**FIGURE S4** | Detection of gene overexpression (OE) transformants by PCR. The primer pair *VmGlu2*-ID-F/R was used to detect *VmGlu2* overexpression transformants.
